# American Neuropsychiatric Association

The Westin Gaslamp Quarter

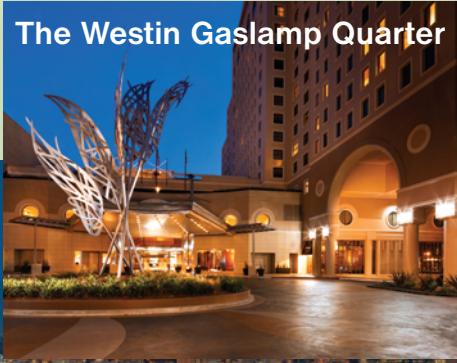

## San Diego, California

### March 16-19, 2016

# Call for Abstracts

You are invited to submit abstracts reporting new research or challenging clinical cases for poster or platform presentations. **DEADLINE** for receipt of abstracts is October 26, 2015.

Abstracts presented at the meeting will be published online in the Spring 2016 issue of *The Journal of Neuropsychiatry and Clinical Neurosciences*.

Prior to submitting abstracts, please refer to our website for information about ANPA's award programs, platform sessions, and poster session.

**Early Registration NOW OPEN** [www.anpaonline.org/event-registration](http://www.anpaonline.org/event-registration)

**SPEAKER HIGHLIGHT:** Ann M. Graybiel, PhD; Karl Deisseroth, MD, PhD;  
David G. Amaral, PhD; Antonio Damasio, MD, PhD

#### SESSIONS OVERVIEW:

- Neural Substrates of Intellect and Emotion
- Over and Over Again: Clinical and Biological Aspects of Stereotypic Disorders
- Body Image in Neuropsychiatry
- Neuropsychiatric Aspects of Suicidal Behavior: Insights from Epilepsy
- The Neuropsychiatric Presentation of Metabolic Disorders in Pediatric Patients
- Clinical Neuroethics in a New Era of Neurointervention
- Neuropsychiatry Workshop 101: Psychopharmacology in Neuropsychiatry

#### SESSION CHAIRS:

Kevin J. Black, MD  
Dale C. Hesdorffer, PhD  
Daniel I. Kaufer, MD  
Jay A. Salpekar MD  
Sanjai Rao, MD  
Jeremy D. Schmahmann, MD  
Michael R. Trimble, MD  
Anthony P. Weiss, MD, MBA

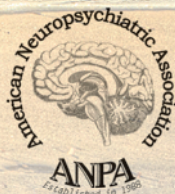

For more information contact the American Neuropsychiatric Association office at:  
[anpaoffice@gmail.com](mailto:anpaoffice@gmail.com)

SAN  
DIEGO

# The Journal of Neuropsychiatry and Clinical Neurosciences

Official Journal of the American Neuropsychiatric Association

## Editorial Board

The *Journal of Neuropsychiatry and Clinical Neurosciences* (ISSN 0895-0172), is published quarterly by the American Psychiatric Association (APA), 1000 Wilson Blvd., Suite 1825, Arlington, VA 22209. Copyright © 2015 American Psychiatric Association. The *Journal of Neuropsychiatry and Clinical Neurosciences*, is protected by copyright and may not be reproduced in any manner without written permission. The *Journal of Neuropsychiatry and Clinical Neurosciences* is abstracted/indexed in *Chemical Abstracts*, *Current Contents/Clinical Medicine*®, *EMBASE/Excerpta Medica*, *Index Medicus/MEDLINE/MEDLARS*, *PsycINFO*, *Psychological Abstracts*, *Research Alert*®, and *Sci Search*®. It is available through University Microfilms, Inc., 300 North Zeeb Road, Ann Arbor, MI 48106, in microform, electronic, or paper format.

Manuscript submissions should no longer be sent by mail. Please visit <http://mc.manuscriptcentral.com> to upload a paper online.

U.S. subscriptions are \$250 per year (4 issues) individual; \$200 for APA members; international subscriptions are \$377 per year; \$302 for international members. APA Members receive 20% discount off regular individual subscription rate. Institutional Subscriptions are tier priced. For institutional site license information and pricing, please email us at [appi@psych.org](mailto:appi@psych.org), call (800) 368-5777 or visit [www.appi.org/ForLibrarians/](http://www.appi.org/ForLibrarians/). The *Journal of Neuropsychiatry and Clinical Neurosciences*, 1000 Wilson Blvd., Suite 1825, Arlington, VA 22209.

Advertising inquiries may be directed to Tim Wolfinger at PMI, 30 East 33rd St., New York, NY 10016; (212) 904-0379; [twolfinger@pminy.com](mailto:twolfinger@pminy.com).

APA is not responsible for statements made in this publication by contributors or advertisers. Unless stated, material in the *Journal of Neuropsychiatry and Clinical Neurosciences* does not reflect the endorsement, official attitude, or position of APA or the American Neuropsychiatric Association.

Periodicals postage paid at Arlington, VA, and additional mailing offices. POSTMASTER: Send address changes to the *Journal of Neuropsychiatry and Clinical Neurosciences*, 1000 Wilson Blvd., Suite 1825, Arlington, VA 22209.

**Editor**  
Stuart C. Yudofsky, M.D.

**Deputy Editors**  
C. Alan Anderson, M.D.  
David B. Arciniegas, M.D.  
Robert E. Hales, M.D., M.B.A.

**Assistant to the Editors**  
T. Angelita Garcia, M.B.A.

**Consulting Editors**  
C. Edward Coffey, M.D.  
Thomas W. McAllister, M.D.  
Henry Nasrallah, M.D.  
Fred Ovsiew, M.D.  
Jonathan M. Silver, M.D.

**Associate Editors**  
Sheldon Benjamin, M.D.  
Kevin J. Black, M.D.  
Nashaat N. Boutros, M.D.  
John J. Campbell, M.D.  
Miles Cunningham, M.D.  
Michael Ebert, M.D.  
Richard B. Ferrell, M.D.  
Laura A. Flashman, Ph.D.  
Yonas E. Geda, M.D.  
Daniel I. Kaufer, M.D.  
W. Curt LaFrance, M.D.  
Edward C. Lauterbach, M.D.  
Mario Mendez, M.D., Ph.D.  
Charles Nemeroff, M.D., Ph.D.  
Trevor R. P. Price, M.D.  
Robert G. Robinson, M.D.  
David A. Silbersweig, M.D.  
Robert Stern, Ph.D.  
Kaloyan S. Tanev, M.D.  
Paula T. Trzepacz, M.D.  
Hal S. Wortzel, M.D.

**Neuropsychiatry Classics Editor**  
Thomas C. Neylan, M.D.

**Book Review Editor**  
Michael Schrift, D.O., M.A.

**Windows to the Brain Editors**  
Robin A. Hurley, M.D.  
L. Anne Hayman, M.D.  
Katherine H. Taber, Ph.D.

**American Psychiatric Association  
Publishing**

Rebecca D. Rinehart  
*Publisher*  
Michael Roy  
*Editorial Director, Journals*  
Angela Moore  
*Editorial Manager*  
Susan Westrate  
*Production Manager, Journals*  
Heidi Koch  
*Editorial Support Services Manager*  
Patrick Hansard  
*Director of Marketing and Sales*  
Christopher Keene  
*Sales Manager*  
Roger Domras  
*Director of Fulfillment and  
Circulation*

AMERICAN  
PSYCHIATRIC  
ASSOCIATION  
PUBLISHING

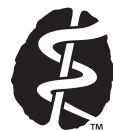

Please visit the Journal's website at [neuro.psychiatryonline.org](http://neuro.psychiatryonline.org)

# DSM-5 SELECTIONS

## DSM-5® Selections

American Psychiatric Association

These selections provide a comprehensive overview of the process of diagnosing disorders while serving as a reference guide to assist in the diagnosis of individual patients. The disorder-specific resource is an invaluable addition to the DSM-5® collection and an important contribution to the mental health profession.

This book contains the critical disorder-specific content from these four titles:

- Diagnostic and Statistical Manual of Mental Disorders, Fifth Edition (DSM-5®)
- DSM-5® Clinical Cases
- DSM-5® Self-Exam Questions
- DSM-5® Guidebook

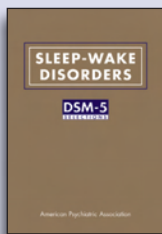

*Just Published!*

**Sleep-Wake Disorders**  
DSM-5® Selections

2015 • 160 pages  
ISBN 978-1-61537-009-2  
Paperback • \$39.00  
Item #37009

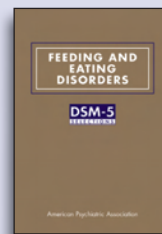

*Just Published!*

**Feeding and Eating Disorders**  
DSM-5® Selections

2016 • 81 pages  
ISBN 978-1-61537-012-2  
Paperback • \$39.00  
Item #37012

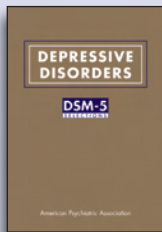

*Just Published!*

**Depressive Disorders**  
DSM-5® Selections

2015 • 118 pages  
ISBN 978-1-61537-010-8  
Paperback • \$39.00  
Item #37010

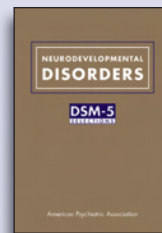

*Coming September 2015!*

**Neurodevelopmental Disorders**  
DSM-5® Selections

2016 • 161 pages  
ISBN 978-1-61537-013-9  
Paperback • \$39.00  
Item #37013

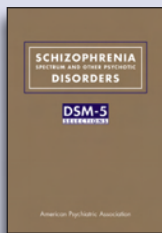

*Just Published!*

**Schizophrenia Spectrum and  
Other Psychotic Disorders**  
DSM-5® Selections

2015 • 116 pages  
ISBN 978-1-61537-011-5  
Paperback • \$39.00  
Item #37011

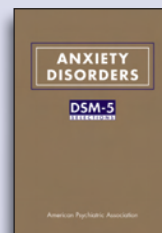

*Coming October 2015!*

**Anxiety Disorders**  
DSM-5® Selections

2016 • 110 pages  
ISBN 978-1-61537-014-6  
Paperback • \$39.00  
Item #37014

AMERICAN  
**PSYCHIATRIC**  
ASSOCIATION  
**PUBLISHING**

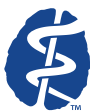

Order Online: [www.appi.org](http://www.appi.org)  
Phone: 703-907-7322  
Toll Free: 1-800-368-5777  
Email: [appi@psych.org](mailto:appi@psych.org)

20% Discount for American Psychiatric  
Association Members

25% Discount for APA Resident-Fellow Members AH1528A
