FALL 2015 | VOLUME 27 | NUMBER 4

The Journal of  
**Neuropsychiatry**  
and Clinical Neurosciences

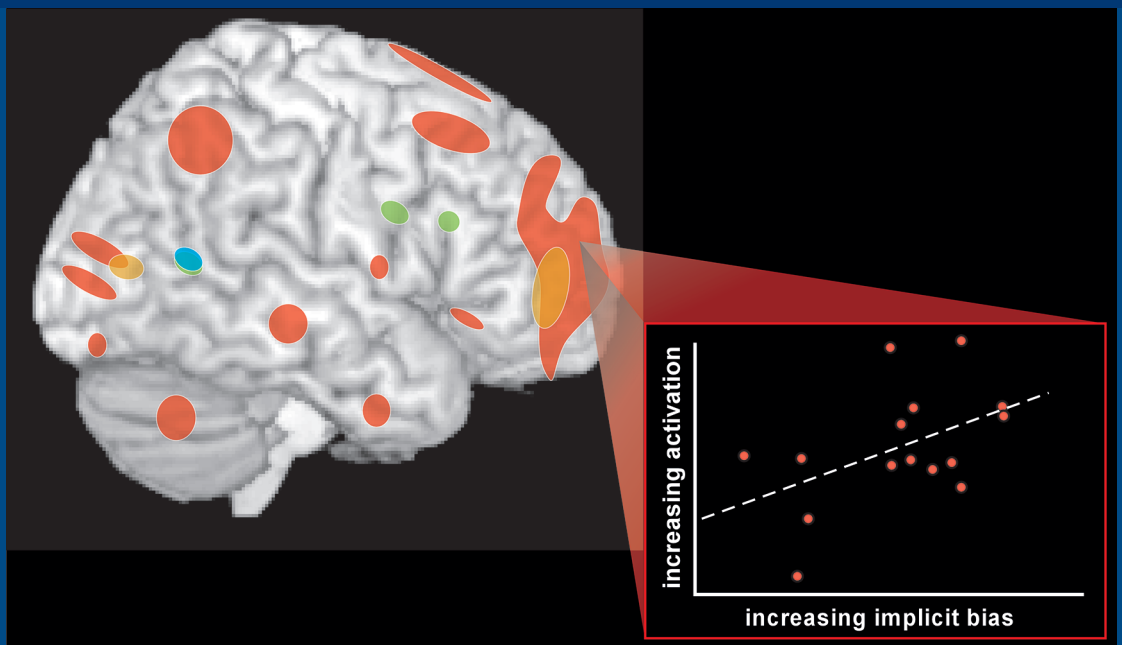

Neurobiology of Implicit and Explicit Bias: Implications for Clinicians

Personality Change Due to Traumatic Brain Injury in Children  
and Adolescents: Neurocognitive Correlates

Preinjury Emotional-Behavioral Functioning of Children With Lingering  
Problems After Mild Traumatic Brain Injury

Multigenerational Positive Family History of Psychiatric Disorders  
Is Associated With a Poor Prognosis in Bipolar Disorder

Anxiety in Huntington's Disease

Official Journal of the American Neuropsychiatric Association  
[neuro.psychiatryonline.org](http://neuro.psychiatryonline.org)
